# Supplementary material for: Potent and persistent in vivo anti-HBV activity of chemically modified siRNAs
Source: Springer Nature journal article supplement (doi:10.1038/nbt1122), 2005-07-24
Supplement: 41587_2005_BFnbt1122_MOESM2_ESM.pdf [file 41587_2005_BFnbt1122_MOESM2_ESM.pdf]

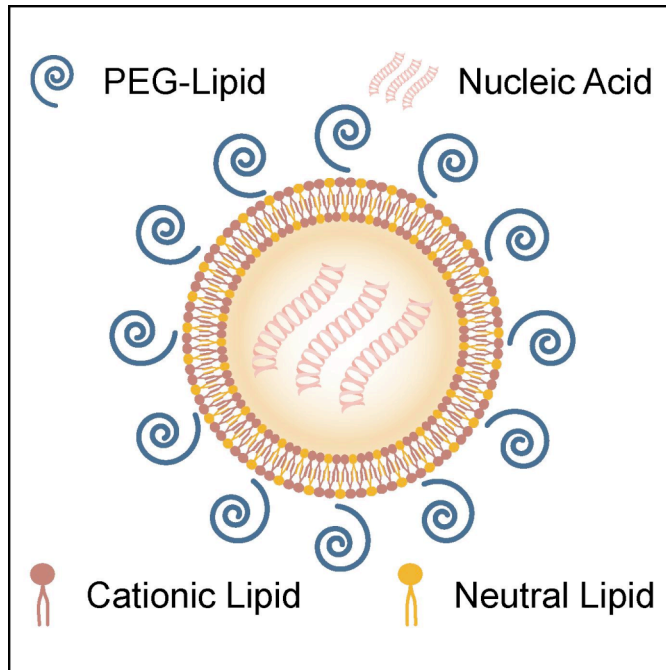

**Supplementary Figure 2. SNALP Structure.** SNALP are comprised of a nucleic acid payload (siRNA in this work) fully encapsulated inside a lipid bilayer consisting of cationic lipid(s), neutral lipid(s) and diffusible PEG-lipid(s) fusion regulators. SNALP with a lipid composition of DLinDMA:DSPC:Chol: PEG-C-DMA (20:48:2:30 molar percent) were prepared using the spontaneous vesicle formation by ethanol dilution method [Jeffer et al. 2005].
