# Supplementary material for: Potent and persistent in vivo anti-HBV activity of chemically modified siRNAs
Source: Springer Nature journal article supplement (doi:10.1038/nbt1122), 2005-07-24
Supplement: 41587_2005_BFnbt1122_MOESM3_ESM.pdf [file 41587_2005_BFnbt1122_MOESM3_ESM.pdf]

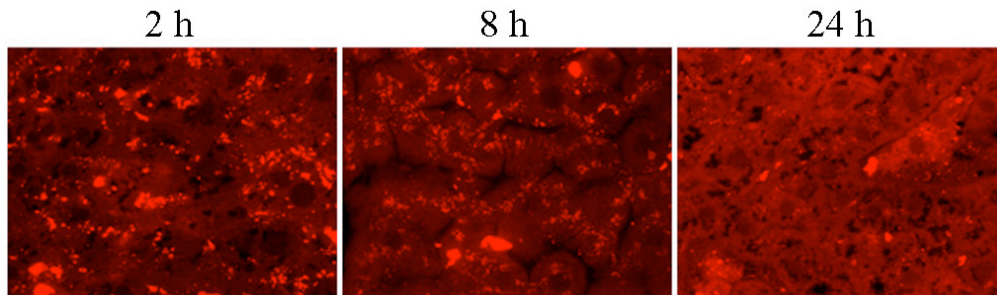

**Supplementary Figure 3. *In vivo* localization of SNALP formulated Cy3-labeled siRNA in mouse livers.** CD1 mice injected intravenously with SNALP encapsulated cy-3 labeled HBV263M, at a dose of 3 mg/kg per mouse. At a series of time points post injection (2 h, 8 h, 1 day, 2 days, 3 days, 6 days, and 7 days, respectively), livers were harvested from saline-perfused mice. Liver tissue was fixed, impeded, and sectioned. Slides of sectioned livers were mounted and images were acquired by confocal microscopy. Views at 60X are shown for the 2, 8, and 24 h time points.
