# Supplementary material for: Potent and persistent in vivo anti-HBV activity of chemically modified siRNAs
Source: Springer Nature journal article supplement (doi:10.1038/nbt1122), 2005-07-24
Supplement: 41587_2005_BFnbt1122_MOESM4_ESM.pdf [file 41587_2005_BFnbt1122_MOESM4_ESM.pdf]

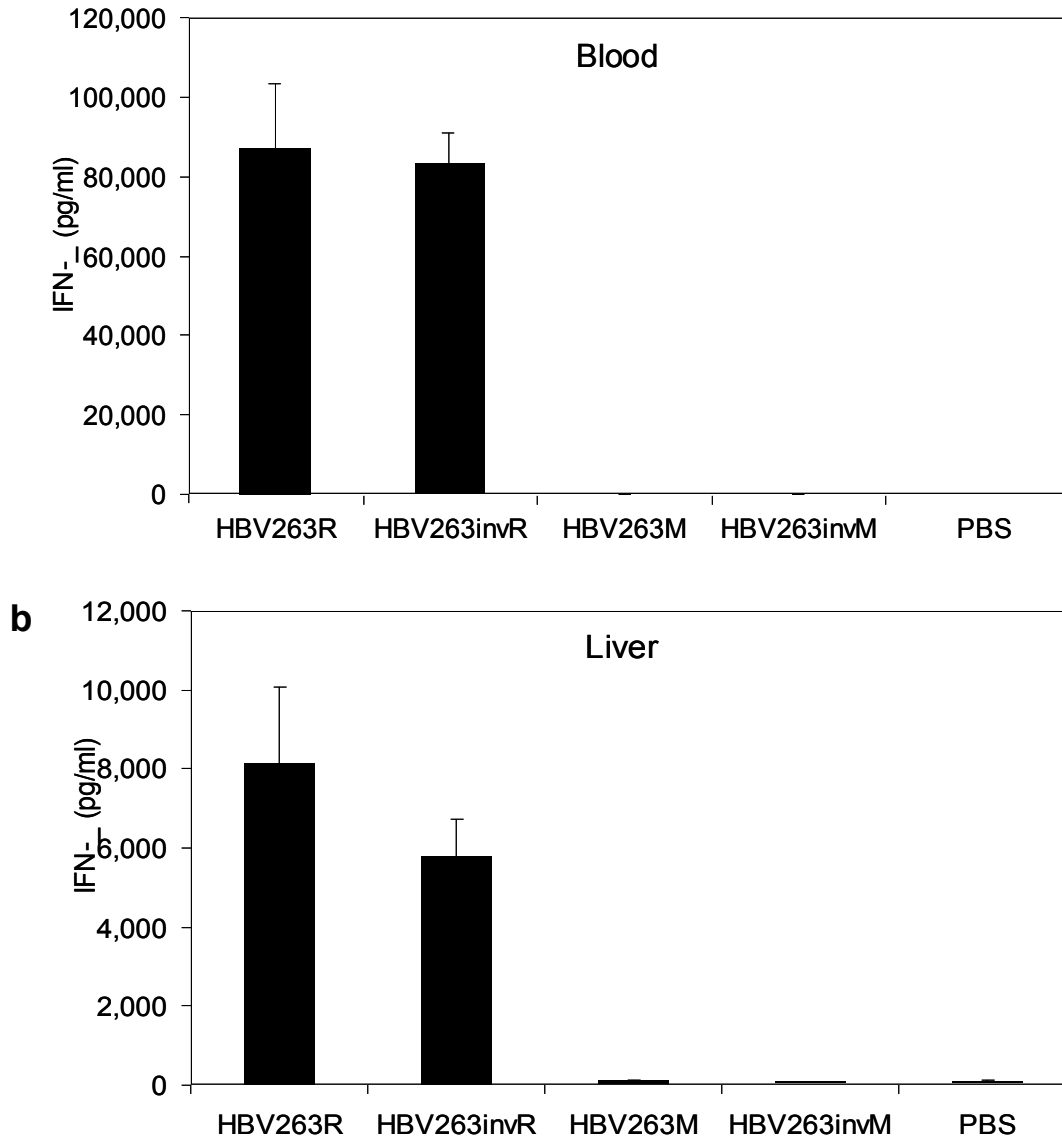

**Supplementary Figure 4.** Chemically stabilized HBV siRNA do not induce local interferon production in the liver. Interferon- $\alpha$  levels in **(a)** blood plasma and **(b)** Liver homogenates of Balb/C mice 6h after intravenous administration of SNALP formulated HBV263R, HBV263invR (unmodified), HBV263M and HBV263invM (chemically stabilized) siRNA. SNALP were administered at 5 mg/kg siRNA. Level of detection >32 pg/ml IFN- $\alpha$ . Livers were homogenized in PBS at 1 mg tissue/ml. Values represent mean + SD; n = 4 mice.
