# Supplementary material for: Potent and persistent in vivo anti-HBV activity of chemically modified siRNAs
Source: Springer Nature journal article supplement (doi:10.1038/nbt1122), 2005-07-24
Supplement: 41587_2005_BFnbt1122_MOESM5_ESM.pdf [file 41587_2005_BFnbt1122_MOESM5_ESM.pdf]

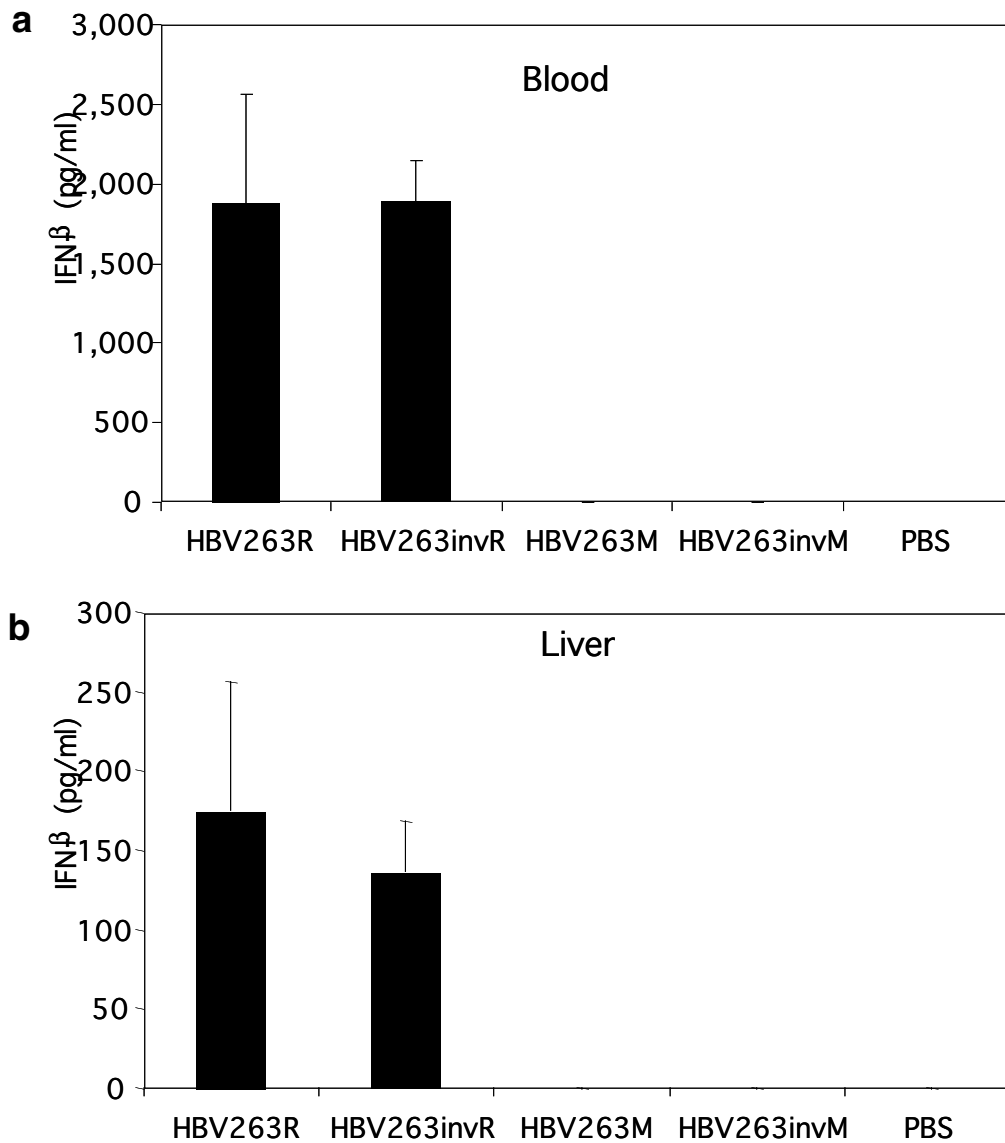

**Supplementary Figure 5.** Chemically stabilized HBV siRNA do not induce local interferon-beta production in the liver. Interferon- $\beta$  levels in **(a)** blood plasma and **(b)** Liver homogenates of mice 6h after intravenous administration of SNALP formulated HBV263R, HBV263invR (unmodified), HBV263M and HBV263invM (chemically stabilized) siRNA. SNALP were administered at 5 mg/kg siRNA. Livers were homogenized in PBS at 1 mg tissue/ml. Values represent mean + SD; n = 4 mice.
