# Supplementary material for: Potent and persistent in vivo anti-HBV activity of chemically modified siRNAs
Source: Springer Nature journal article supplement (doi:10.1038/nbt1122), 2005-07-24
Supplement: 41587_2005_BFnbt1122_MOESM6_ESM.pdf [file 41587_2005_BFnbt1122_MOESM6_ESM.pdf]

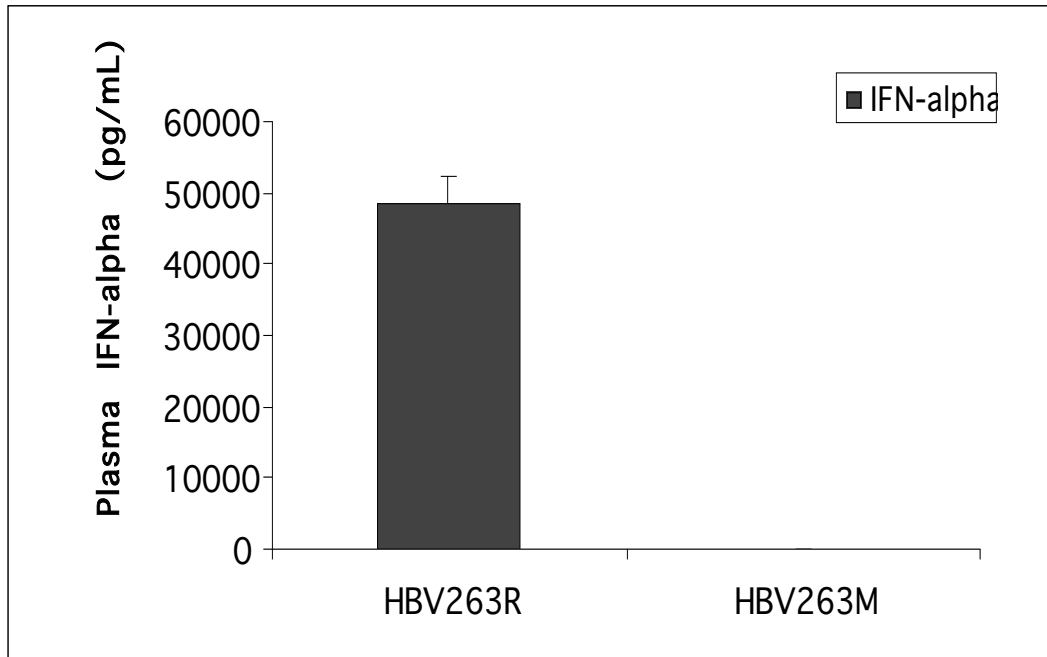

**Supplementary Figure 6.** NOD.scid mice generate robust Interferon to unmodified siRNA. Plasma Interferon- $\alpha$  in NOD.scid, mice 6h after administration of SNALP encapsulating unmodified and modified siRNA. siRNA was dosed at 5 mg/kg. Mice treated with vehicle alone had no detectable levels of plasma IFN- $\alpha$  (levels of quantitation are 12.5 pg/ml). Values represent mean + SD; n = 4 mice.
